# Supplementary material for: Genomic Characterization and Environmental Distribution of a Thermophilic Anaerobe Dissulfurirhabdus thermomarina SH388T Involved in Disproportionation of Sulfur Compounds in Shallow Sea Hydrothermal Vents
Source: PubMed Central journal article supplement (PMC7463578; doi:10.3390/microorganisms8081132), 2020-07-27
Supplement: microorganisms-08-01132-s001.pdf [file microorganisms-08-01132-s001.pdf]

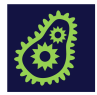

Supplementary material

# Genomic characterization and environmental distribution of a thermophilic anaerobe *Dissulfurirhabdus thermomarina* SH388<sup>T</sup> involved in disproportionation of sulfur compounds in shallow-sea hydrothermal vents

Maxime Allieux <sup>1</sup>, Stéven Yvenou <sup>1</sup>, Galina Slobodkina <sup>2</sup>, Alexander Slobodkin <sup>2</sup>, Zongze Shao <sup>3</sup>, Mohamed Jebbar <sup>1</sup> and Karine Alain <sup>1,\*</sup>

<sup>1</sup> Univ Brest, CNRS, IFREMER, LIA1211, Laboratoire de Microbiologie des Environnements Extrêmes LM2E, IUEM, Rue Dumont d'Urville, F-29280 Plouzané, France; Maxime.Allieux@univ-brest.fr (M.A.); steven.yvenou@gmail.com (S.Y.); Mohamed.Jebbar@univ-brest.fr (M.J.); Karine.Alain@univ-brest.fr (K.A.)

<sup>2</sup> Winogradsky Institute of Microbiology, Research Center of Biotechnology of the Russian Academy of Sciences, 117312 Moscow, Russia; gslobodkina@mail.ru (G.S.); aslobodkin@hotmail.com (A.S.)

<sup>3</sup> Key Laboratory of Marine Genetic Resources, Third Institute of Oceanography, Ministry of Natural Resources, Xiamen 361005, China; shaozongze@tio.org.cn (Z.S.)

\* Correspondence: Karine.Alain@univ-brest.fr

**Supplementary Material S1: *Dissulfurirhabdus thermomarina* SH388<sup>T</sup> genome locus tags, genomic islands composition, and results of comparative genomics.**

## S1.1. Synthesis of the gene loci

**Table S1.1.** Correspondences between the loci of the annotations by Prokka, Dfast, RAST, PGAP (2020-03-30.build4489) and UniProtKB with the CDSs of the NCBI's online automated prokaryotic genome annotation pipeline. CDSs found with their associated loci, based on the assembly repository ASM1297923v1 (Abbreviation: NR, not retrieved).

| Gene name                                                                      | Gene associated Locus (NCBI PGAP)             |
|--------------------------------------------------------------------------------|-----------------------------------------------|
| <b>Gene related to carbon metabolism:</b>                                      |                                               |
| <b>Wood-Ljundhal</b>                                                           |                                               |
| Formate dehydrogenase                                                          | HCU62_RS06340                                 |
| formate--tetrahydrofolate ligase                                               | HCU62_RS06190                                 |
| FolD bifunctional 5,10-methylene-tetrahydrofolate dehydrogenase/cyclohydrolase | HCU62_RS06185                                 |
| 5-methyltetrahydrofolate:corrinoic/iron-sulfur protein co-methyltransferase    | HCU62_RS06135                                 |
| 5,10-methylenetetrahydrofolate reductase                                       | HCU62_RS06150                                 |
| carbon monoxide dehydrogenase                                                  | HCU62_RS06180                                 |
| Acetyl-CoA decarboxylase/synthase                                              | HCU62_RS06140 ; HCU62_RS06145                 |
| <b>Glycolysis</b>                                                              |                                               |
| glucose-6-phosphate isomerase                                                  | HCU62_RS09635                                 |
| fructose-1,6-bisphosphatase                                                    | HCU62_RS01815                                 |
| ATP-dependent 6-phosphofructokinase                                            | HCU62_RS01170                                 |
| fructose-bisphosphate aldolase                                                 | HCU62_RS04890                                 |
| triose-phosphate isomerase                                                     | HCU62_RS06960                                 |
| glyceraldehyde-3-phosphate dehydrogenase                                       | HCU62_RS06940                                 |
| phosphoglycerate kinase                                                        | HCU62_RS06955                                 |
| 2,3-bisphosphoglycerate-independent phosphoglycerate mutase                    | HCU62_RS01330 ; HCU62_RS03440                 |
| phosphopyruvate hydratase                                                      | HCU62_RS01970                                 |
| phosphoenolpyruvate synthase                                                   | HCU62_RS09245                                 |
| pyruvate kinase                                                                | HCU62_RS10405                                 |
| <b>Glycogen degradation</b>                                                    |                                               |
| glycogen phosphorylase                                                         | HCU62_RS04055                                 |
| alpha-D-glucose phosphate-specific phosphoglucomutase                          | HCU62_RS05730                                 |
| <b>Pyruvate fermentation to acetate</b>                                        |                                               |
| acetate—CoA ligase                                                             | HCU62_RS09440                                 |
| pyruvate synthase                                                              | HCU62_RS00790 ; HCU62_RS00785 ; HCU62_RS00800 |
| <b>Pentose phosphate pathway</b>                                               |                                               |
| glucose-6-phosphate dehydrogenase                                              | HCU62_RS08000                                 |
| 6-phosphogluconolactonase                                                      | HCU62_RS07995                                 |
| 6-phosphogluconate dehydrogenase                                               | HCU62_RS08005                                 |
| ribose-5-phosphate isomerase                                                   | HCU62_RS01010                                 |
| ribulose-phosphate 3-epimerase                                                 | HCU62_RS08705                                 |
| transketolase (glycolaldehydetransferase)                                      | HCU62_RS03690                                 |
| transaldolase (dihydroxyacetone transferase)                                   | HCU62_RS08675                                 |
| <b>Formate associated enzymes</b>                                              |                                               |
| formate dehydrogenase                                                          | HCU62_RS01485 ; HCU62_RS06125 ; HCU62_RS06340 |
| formate—tetrahydrofolate ligase                                                | HCU62_RS06190                                 |

| Gene name                                                                                           | Gene associated Locus (NCBI PGAP)                                             |
|-----------------------------------------------------------------------------------------------------|-------------------------------------------------------------------------------|
| <b>Genes related to hydrogen metabolism:</b>                                                        |                                                                               |
| methyl-viologen-reducing hydrogenase delta subunit/coenzyme F420-reducing hydrogenase delta subunit | HCU62_RS00680 ; HCU62_RS03360 ; HCU62_RS06160 ; HCU62_RS06170 ; HCU62_RS06335 |
| HypC/HybG/HupF family hydrogenase formation chaperone                                               | HCU62_RS01665                                                                 |
| hydrogenase formation protein HypD                                                                  | HCU62_RS01670                                                                 |
| hydrogenase expression/formation protein HypE                                                       | HCU62_RS01675                                                                 |
| hydrogenase maturation protease                                                                     | HCU62_RS01680                                                                 |
| hydrogenase maturation nickel metallochaperone HypA                                                 | HCU62_RS01685                                                                 |
| hydrogenase nickel incorporation protein HypB                                                       | HCU62_RS01690                                                                 |
| hydrogenase-2 small chain                                                                           | HCU62_RS02130                                                                 |
| nickel-dependent hydrogenase large subunit                                                          | HCU62_RS02135                                                                 |
| Ni/Fe-hydrogenase, b-type cytochrome subunit                                                        | HCU62_RS02140                                                                 |
| <b>Genes related to nitrogen metabolism:</b>                                                        |                                                                               |
| hydroxylamine oxidase                                                                               | HCU62_RS03110                                                                 |
| hydroxylamine reductase                                                                             | HCU62_RS07985                                                                 |
| ammonia transporter                                                                                 | HCU62_02830                                                                   |
| P-II family nitrogen regulator                                                                      | HCU62_RS02830 ; HCU62_RS02845                                                 |
| <b>Genes related to sulfur metabolism:</b>                                                          |                                                                               |
| sulfate adenylyltransferase                                                                         | HCU62_RS05615 ; HCU62_RS05700                                                 |
| adenylyl-sulfate reductase subunit A                                                                | HCU62_RS05605                                                                 |
| adenylyl-sulfate reductase subunit B                                                                | HCU62_RS05610                                                                 |
| manganese-dependent inorganic pyrophosphatase                                                       | HCU62_RS08685                                                                 |
| dissimilatory sulfite reductase subunits alpha                                                      | HCU62_RS08555                                                                 |
| dissimilatory sulfite reductase subunits beta                                                       | HCU62_RS08560                                                                 |
| dissimilatory sulfite reductase subunits gamma                                                      | HCU62_RS09615                                                                 |
| dissimilatory sulfite reductase D                                                                   | HCU62_RS08565                                                                 |
| DsrM                                                                                                | HCU62_RS08595                                                                 |
| DsrK                                                                                                | HCU62_RS08600                                                                 |
| DsrJ                                                                                                | HCU62_RS08605                                                                 |
| DsrO                                                                                                | HCU62_RS08610                                                                 |
| DsrP                                                                                                | HCU62_RS08615                                                                 |
| QmoA                                                                                                | HCU62_RS05600                                                                 |
| QmoB                                                                                                | HCU62_RS05595                                                                 |
| QmoC                                                                                                | HCU62_RS05590                                                                 |
| sulfurtransferase TusA family protein                                                               | HCU62_RS03365 ; HCU62_RS06620                                                 |
| sulfurtransferase                                                                                   | HCU62_RS06555 ; HCU62_RS06560                                                 |
| polysulfide reductase NrfD                                                                          | HCU62_RS00235 ; HCU62_RS11490 ; HCU62_RS11500                                 |
| polysulfide/tetrathionate/thiosulfate reductase associated proteins                                 | HCU62_RS07540 ; NR                                                            |
| TorD-like chaperon protein                                                                          | HCU62_RS07530                                                                 |
| molybdopterin oxidoreductase                                                                        | HCU62_RS06125 ; HCU62_RS07535 ; HCU62_RS07580 ; HCU62_RS10115                 |
| rhodanese-like domain-containing protein                                                            | HCU62_RS02325 ; HCU62_07590                                                   |
| putative thiosulfate sulfurtransferase                                                              | HCU62_RS06560                                                                 |

## S1.2. Annotation of Genes of Genomic Islands

**Table S1.2.** Gene annotations within the genomic islands (GI) of *Dissulfurirhabdus thermomarina* SH388<sup>T</sup>, based on the IslandViewer 4 webservice.

| Genomic island | Gene start | Gene end | Strand | Product                                         |
|----------------|------------|----------|--------|-------------------------------------------------|
| GI 1           | 1793219    | 1795750  | 1      | sugar ABC transporter substrate-binding protein |
| GI 1           | 1795761    | 1796717  | 1      | LPS biosynthesis protein                        |
| GI 1           | 1796736    | 1797908  | 1      | hypothetical protein                            |
| GI 1           | 1797905    | 1799242  | 1      | polysaccharide biosynthesis related protein     |
| GI 1           | 1799525    | 1800247  | 1      | hypothetical protein                            |
| GI 1           | 1800508    | 1801404  | 1      | sulfotransferase family protein                 |
| GI 1           | 1802691    | 1803914  | 1      | glycosyl transferase family 1                   |
| GI 1           | 1803904    | 1804683  | 1      | acetyl-mannosamine transferase                  |
| GI 1           | 1804791    | 1805603  | 1      | hypothetical protein                            |
| GI 1           | 1805600    | 1806730  | 1      | GDP-mannose 4,6-dehydratase                     |
| GI 1           | 1806768    | 1807709  | 1      | GDP-L-fucose synthase                           |
| GI 1           | 1807723    | 1809150  | 1      | mannose-6-phosphate isomerase                   |
| GI 1           | 1809117    | 1810670  | -1     | Phosphomannomutase                              |
|                |            |          |        |                                                 |
| GI 2           | 1867701    | 1869266  | 1      | hypothetical protein                            |
| GI 2           | 1870044    | 1870256  | -1     | hypothetical protein                            |
| GI 2           | 1870376    | 1870660  | 1      | hypothetical protein                            |
| GI 2           | 1870586    | 1871059  | -1     | hypothetical protein                            |
| GI 2           | 1871214    | 1872170  | 1      | IS30 family transposase                         |
| GI 2           | 1872355    | 1872564  | -1     | hypothetical protein                            |
| GI 2           | 1872561    | 1873196  | -1     | hypothetical protein                            |
| GI 2           | 1875044    | 1875547  | -1     | hypothetical protein                            |
| GI 2           | 1875917    | 1876378  | -1     | hypothetical protein                            |
| GI 2           | 1876378    | 1876983  | -1     | hypothetical protein                            |
| GI 2           | 1877128    | 1877793  | -1     | hypothetical protein                            |
| GI 2           | 1878138    | 1878791  | -1     | hypothetical protein                            |
| GI 2           | 1878926    | 1879153  | -1     | hypothetical protein                            |
| GI 2           | 1881275    | 1882240  | 1      | hypothetical protein                            |
| GI 2           | 1882711    | 1884291  | -1     | RNA polymerase sigma factor RpoD                |

### S1.3. Comparative genomics

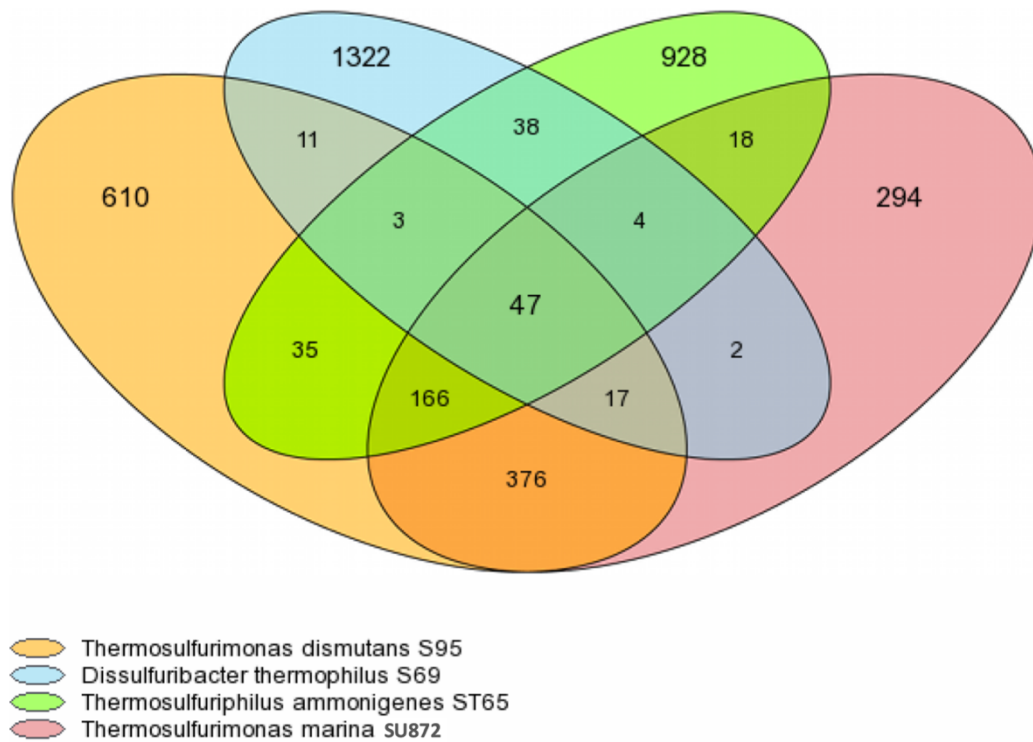

**Figure S1.3.** Homologous CDSs found by comparative genomics with the MaGE platform among the genomes of the hydrothermal bacteria *Thermosulfurimonas marina*, *Thermosulfuriphilus ammonigenes*, *Dissulfuribacter thermophilus*, and *Thermosulfurimonas dismutans*, excluding homologous CDSs from the genome of *D. thermomarina*.
